# Supplementary material for: Associations of education and income with hazardous drinking among postpartum women in Japan: results from the TMM BirThree Cohort Study
Source: PubMed Central journal article supplement (PMC8254918; doi:10.1186/s12199-021-00991-9), 2021-07-03
Supplement: 12199_2021_991_MOESM1_ESM.pdf [file 12199_2021_991_MOESM1_ESM.pdf]

## Supplementary material

**Table S1. Characteristics differences between 11,031 participants who were analyzed and 11,462 participants who were excluded from the analysis**

|                                          | Participants who were analyzed<br>(n=11,031) |        | Participants who were not analyzed<br>(n=11,462) |        | <i>p</i> -value <sup>a</sup> |
|------------------------------------------|----------------------------------------------|--------|--------------------------------------------------|--------|------------------------------|
|                                          | n                                            | (%)    | n                                                | (%)    |                              |
| Educational attainment                   |                                              |        |                                                  |        | <0.001                       |
| University or higher                     | 3268                                         | (29.6) | 574                                              | (22.8) |                              |
| College                                  | 4263                                         | (38.7) | 996                                              | (39.5) |                              |
| High school or lower                     | 3500                                         | (31.7) | 952                                              | (37.7) |                              |
| Equivalent household income              |                                              |        |                                                  |        | <0.001                       |
| ≥4.00 million JPY                        | 2909                                         | (26.4) | 1962                                             | (22.6) |                              |
| 3.00–3.99 million JPY                    | 2068                                         | (18.7) | 1521                                             | (17.6) |                              |
| 2.00–2.99 million JPY                    | 3514                                         | (31.9) | 2784                                             | (32.2) |                              |
| ≤1.99 million JPY                        | 2540                                         | (23.0) | 2386                                             | (27.6) |                              |
| Covariates                               |                                              |        |                                                  |        |                              |
| Age                                      |                                              |        |                                                  |        | <0.001                       |
| ≤29 years                                | 3226                                         | (29.2) | 4161                                             | (38.3) |                              |
| 30–34 years                              | 4211                                         | (38.2) | 3775                                             | (34.8) |                              |
| ≥35 years                                | 3594                                         | (32.6) | 2927                                             | (26.9) |                              |
| Multiparous                              | 5761                                         | (52.2) | 5610                                             | (50.4) | 0.0073                       |
| Drinking during pregnancy                | 701                                          | (6.4)  | 579                                              | (5.9)  | 0.15                         |
| Working                                  | 5815                                         | (52.7) | 1286                                             | (52.6) | 0.95                         |
| Postpartum depression                    | 1423                                         | (12.9) | 308                                              | (14.8) | 0.020                        |
| Breastfeeding                            | 6741                                         | (61.1) | 1253                                             | (44.6) | <0.001                       |
| Hazardous drinking 1 year after delivery | 397                                          | (3.6)  | 110                                              | (4.9)  | 0.0026                       |

JPY, Japanese yen.

Percentages are shown after excluding participants whose values were missing.

<sup>a</sup>Obtained using the chi-square test, comparing participants who were analyzed and participants who were not.

**Table S2. Associations of education and income with hazardous drinking 1 year after delivery among drinkers**

|                                  | Hazardous drinking<br>/drinkers | (%)    | Model 1<br>OR (95% CI) | Model 2a<br>OR (95% CI) | Model 2b<br>OR (95% CI) | Model 3<br>OR (95% CI) |
|----------------------------------|---------------------------------|--------|------------------------|-------------------------|-------------------------|------------------------|
| Total                            | 397/2405                        | (16.5) |                        |                         |                         |                        |
| Educational attainment           |                                 |        |                        |                         |                         |                        |
| University or higher             | 62/666                          | (9.3)  | 1.00                   | 1.00                    |                         | 1.00                   |
| College                          | 150/896                         | (16.7) | 1.97 (1.43–2.69)       | 1.90 (1.38–2.61)        |                         | 1.82 (1.32–2.52)       |
| High school or lower             | 185/843                         | (22.0) | 2.90 (2.12–3.96)       | 2.67 (1.94–3.67)        |                         | 2.45 (1.76–3.42)       |
| Equivalent household income      |                                 |        |                        |                         |                         |                        |
| ≥4.00 million JPY                | 83/638                          | (13.0) | 1.00                   |                         | 1.00                    | 1.00                   |
| 3.00–3.99 million JPY            | 46/394                          | (11.7) | 0.93 (0.63–1.36)       |                         | 0.97 (0.66–1.44)        | 0.84 (0.57–1.26)       |
| 2.00–2.99 million JPY            | 143/802                         | (17.8) | 1.52 (1.13–2.05)       |                         | 1.46 (1.08–1.98)        | 1.21 (0.89–1.65)       |
| ≤1.99 million JPY                | 125/571                         | (21.9) | 2.01 (1.48–2.74)       |                         | 1.81 (1.30–2.52)        | 1.36 (0.96–1.91)       |
| Covariates                       |                                 |        |                        |                         |                         |                        |
| Age                              |                                 |        |                        |                         |                         |                        |
| ≤29 years                        | 101/714                         | (14.2) | 1.00                   | 1.00                    | 1.00                    | 1.00                   |
| 30–34 years                      | 153/877                         | (17.5) | 1.28 (0.98–1.69)       | 1.47 (1.10–1.95)        | 1.42 (1.07–1.89)        | 1.52 (1.14–2.03)       |
| ≥35 years                        | 143/814                         | (17.6) | 1.29 (0.98–1.71)       | 1.49 (1.11–2.00)        | 1.49 (1.11–2.01)        | 1.58 (1.17–2.13)       |
| Parity                           |                                 |        |                        |                         |                         |                        |
| Nulliparous                      | 128/971                         | (13.2) | 1.00                   | 1.00                    | 1.00                    | 1.00                   |
| Multiparous                      | 269/1434                        | (18.8) | 1.48 (1.17–1.86)       | 1.42 (1.12–1.80)        | 1.31 (1.02–1.69)        | 1.27 (0.98–1.64)       |
| Drinking status during pregnancy |                                 |        |                        |                         |                         |                        |
| Non-drinking                     | 328/2061                        | (15.9) | 1.00                   | 1.00                    | 1.00                    | 1.00                   |
| Drinking                         | 69/344                          | (20.1) | 1.30 (0.98–1.74)       | 1.38 (1.02–1.86)        | 1.38 (1.03–1.86)        | 1.37 (1.01–1.84)       |
| Work status                      |                                 |        |                        |                         |                         |                        |
| Not working                      | 161/972                         | (16.6) | 1.00                   | 1.00                    | 1.00                    | 1.00                   |
| Working                          | 236/1433                        | (16.5) | 0.99 (0.80–1.24)       | 1.06 (0.85–1.33)        | 1.04 (0.83–1.30)        | 1.09 (0.86–1.37)       |
| Postpartum depression            |                                 |        |                        |                         |                         |                        |
| No                               | 334/2096                        | (15.9) | 1.00                   | 1.00                    | 1.00                    | 1.00                   |
| Yes                              | 63/309                          | (20.4) | 1.41 (1.04–1.90)       | 1.30 (0.95–1.77)        | 1.29 (0.95–1.76)        | 1.25 (0.92–1.71)       |
| Breastfeeding                    |                                 |        |                        |                         |                         |                        |
| Yes                              | 78/688                          | (11.3) | 1.00                   | 1.00                    | 1.00                    | 1.00                   |
| No                               | 319/1717                        | (18.6) | 1.87 (1.43–2.45)       | 2.00 (1.52–2.63)        | 2.03 (1.54–2.67)        | 1.98 (1.50–2.61)       |

CI, confidence interval; JPY, Japanese yen; OR, odds ratio.

Model 1: adjusted for age (for all variables in the table).

Model 2a (for education) and 2b (for income): model 1 + adjusted for parity, drinking status during pregnancy, work status, postpartum depression, and breastfeeding.

Model 3: model 2 + adjusted for equivalent household income/educational attainment.
